# Supplementary material
Source: PubMed Central journal article supplement (PMC6945823)
Supplement: NIHMS1063908-supplement-Table_1.pdf [file NIHMS1063908-supplement-Table_1.pdf]

**Table 1**

| <b>Genes</b>                 | <b>Forward Primer</b>   | <b>Reverse Primer</b>   |
|------------------------------|-------------------------|-------------------------|
| <i>c-Fos</i>                 | CGGGTTTCAACGCCGACTA     | TTGGCACTAGAGACGGACAGA   |
| <i>Dusp1</i>                 | GTTGTTGGATTGTCGCTCCTT   | TTGGGCACGATATGCTCCAG    |
| <i>Zfp36</i>                 | TCTCTGCCATCTACGAGAGCC   | CCAGTCAGGCGAGAGGTGA     |
| <i>Act<math>\beta</math></i> | GGCTGTATTCCCCTCCATCG    | CCAGTTGGTA ACAATGCCATGT |
| <i>Bcl2l11</i>               | CCCGGAGATACGGATTGCAC    | GCCTCGCGGTAATCATTTC     |
| <i>Il6</i>                   | TAGTCCTTCCTACCCCAATTTCC | TTGGTCCTTAGCCACTCCTTC   |
| <i>Lif</i>                   | ATTGTGCCCTTACTGCTGCTG   | GCCAGTTGATTCTTGATCTGGT  |
