# Supplementary material
Source: PubMed Central journal article supplement (PMC6945823)
Supplement: NIHMS1063908-supplement-Table_2.pdf [file NIHMS1063908-supplement-Table_2.pdf]

**Table 2**

| <b>Gene Name</b> | <b>Primer Name</b> | <b>Primer sequence</b>         | <b>PCR cycle steps</b>                                                                                                    | <b>Primer combinations</b>                         |
|------------------|--------------------|--------------------------------|---------------------------------------------------------------------------------------------------------------------------|----------------------------------------------------|
| <b>c-FOS</b>     | mFos FP3           | GGACTAAAGATCCTCGTGTCCCC        | Step 1 95 °C 5 min, Step 2 95 °C 30 s, Step 3 55 °C 30 s, Step 4 72 °C 30 s, Step 5 Go to step 2 39x, Step 6 72 °C 5 min  | FP3+RP4 for genotyping<br>FP3+RP5 for Fos deletion |
|                  | mFos RP4           | GCGCATCGCCTTCTATCGC            |                                                                                                                           |                                                    |
|                  | mFos RP5           | GCATGCGTGGAACAGTCTATGG         |                                                                                                                           |                                                    |
| <b>Dusp1</b>     | Dusp1 WTFP         | CAGGTACTGTGTGTCGGTGGTGCTAATG   | Step 1 95 °C 5 min, Step 2 95 °C 30 s, Step 3 55 °C 30 s, Step 4 72 °C 30 s, Step 5 Go to step 2 39x, Step 6 72 °C 5 min  | WTFP+KOPF+CRP for genotyping                       |
|                  | Dusp1 KOPF         | AAATGTGTCAGTTTCATAGCCTGAAGAACG |                                                                                                                           |                                                    |
|                  | Dusp1 CRP          | CTATATCCTCCTGGCACAATCCTCCTAG   |                                                                                                                           |                                                    |
| <b>RosaCreER</b> | Rosa26 F           | AAAGTCGCTCTGAGTTGTTAT          | Step 1 95 °C 5 min, Step 2 95 °C 30 s, Step 3 55 °C 30 s, Step 4 72 °C 1 min, Step 5 Go to step 2 39x, Step 6 72 °C 5 min | Rosa26 F+Rosa 26 R+CreER for genotyping            |
|                  | Rosa 26 R          | GGAGCGGGAGAAATGGATATG          |                                                                                                                           |                                                    |
|                  | CreER              | CCTGATCCTGGCAATTTTCG           |                                                                                                                           |                                                    |
